# Supplementary material
Source: publisher site journal article supplement (https://www.dovepress.com/article/279303)
Supplement: Supplementary file 1 [file get_supplementary_file.php]

**Supplementary materials**

**Table S1.** Statistical Collinearity of the Predictors

| Predictors | Variation inflation factors |
| --- | --- |
| Age | 1.094 |
| Baseline NIHSS score | 1.094 |
| Fast blood glucose | 1.077 |
| Collateral circulation | 1.097 |
| mTICI | 1.018 |

Abbreviations: mTICI, modified Thrombolysis in Cerebral Infarction; NIHSS, National Institutes of Health Stroke Scale.

**Table S2.** Comparison of Variables Between Patients with and without a Favorable Outcome

|  | mRS (0-2) | mRS (3-6) |  |  |  |  |
| --- | --- | --- | --- | --- | --- | --- |
|  | n = 167 | n = 203 | *P* value | *OR* | 95% CI | *P* value |
| Demographics |  |  |  |  |  |  |
| Age, mean (SD) | 63.7 (11.6) | 70.1 (1.2) | < 0.001 | 1.027 | 0.996-1.059 | 0.093 |
| Male sex, n (%) | 109 (65.3) | 101 (49.8) | 0.003 | 1.396 | 0.730-2.671 | 0.313 |
| Medical history, n (%) |  |  |  |  |  |  |
| Hypertension | 108 (64.7) | 144 (70.9) | 0.198 | 0.908 | 0.459-1.797 | 0.781 |
| Diabetes mellitus | 22 (13.2) | 52 (25.6) | 0.003 | 1.459 | 0.607-3.506 | 0.399 |
| Atrial fibrillation | 61 (36.5) | 124 (61.1) | < 0.001 | 1.244 | 0.507-3.052 | 0.633 |
| TOAST, n (%) |  |  | 0.001 |  |  |  |
| LAA | 69 (41.3) | 57 (28.1) |  |  | Reference |  |
| CE | 74 (44.3) | 130 (64.0) |  | 0.680 | 0.226-2.051 | 0.494 |
| Others | 24 (14.4) | 16 (7.9) |  | 0.668 | 0.249-1.791 | 0.422 |
| Baseline data, mean (SD) |  |  |  |  |  |  |
| Baseline SBP | 139.7 (23.1) | 144.1 (22.8) | 0.045 | 0.996 | 0.981-1.010 | 0.551 |
| Baseline DBP | 81.6 (12.4) | 82.2 (15.6) | 0.921 |  |  |  |
| Baseline NIHSS | 15 (12-19) | 18 (15-22) | < 0.001 | 1.128 | 1.055-1.205 | < 0.001 |
| Baseline ASPECT | 9 (8-10) | 8 (8-10) | < 0.001 | 0.877 | 0.659-1.168 | 0.369 |
| OTP, median (IQR) | 260 (210-315) | 240 (200-300) | 0.052 | 0.998 | 0.994-1.002 | 0.329 |
| OTR, median (IQR) | 333 (277-390) | 335 (280-390) | 0.921 |  |  |  |
| Occlusion site, n (%) |  |  | < 0.001 |  |  |  |
| ICA | 10 (6.0) | 86 (42.4) |  | 1.493 | 0.212 | 10.516 |
| ICA-T | 25 (15.0) | 7 (3.4) |  | 3.577 | 1.045-12.243 | 0.042 |
| MCA M1 | 118 (70.7) | 101 (49.8) |  | 1.867 | 0.602-5.797 | 0.280 |
| MCA M2 | 14 (8.4) | 9 (4.4) |  |  | Reference |  |
| Tandem, n (%) | 31 (18.6) | 23 (11.3) | 0.050 | 0.590 | 0.215-1.621 | 0.306 |
| Collateral circulation, n (%) |  |  | < 0.001 |  |  |  |
| Grade 0 | 8 (4.8) | 63 (31.0) |  |  | Reference |  |
| Grade 1 | 69 (41.3) | 94 (46.3) |  | 0.191 | 0.072-0.507 | 0.001 |
| Grade 2 | 90 (53.9) | 46 (22.7) |  | 0.128 | 0.046-0.356 | < 0.001 |
| Laboratory test, mean (SD) |  |  |  |  |  |  |
| FBG | 6.7 (2.3) | 8.5 (3.8) | < 0.001 | 1.139 | 1.003-1.292 | 0.045 |
| LDL | 2.5 (0.8) | 2.4 (1.0) | 0.308 |  |  |  |
| BUN | 5.6 (1.9) | 6.9 (2.8) | < 0.001 | 1.247 | 1.035-1.502 | 0.020 |
| Cr | 79.5 (34.7) | 86.4 (44.7) | 0.107 | 0.995 | 0.983-1.008 | 0.479 |
| Treatment, n (%) |  |  |  |  |  |  |
| Bridging treatment | 43 (25.7) | 43 (21.2) | 0.301 |  |  |  |
| Type of procedure |  |  | 0.017 |  |  |  |
| Stent retriever first | 137 (82.0) | 176 (86.7) |  |  | Reference |  |
| Aspiration first | 5 (3.0) | 13 (6.4) |  | 2.108 | 0.461-9.633 | 0.336 |
| Angioplasty or stent first | 25 (15.0) | 14 (6.9) |  | 1.472 | 0.483-4.488 | 0.496 |
| Rescue treatment | 20 (12.0) | 47 (23.2) | 0.005 | 2.451 | 1.058-5.676 | 0.036 |
| DHC | 2 (1.2) | 16 (7.9) | 0.003 | 0.395 | 0.044-3.561 | 0.408 |
| TICI, 2b-3, n (%) | 145 (86.8) | 127 (62.6) | < 0.001 | 0.297 | 0.143-0.615 | 0.001 |
| MCE, n (%) | 5 (3.0) | 66 (32.5) | < 0.001 | 13.489 | 3.322-54.771 | < 0.001 |

Abbreviations: MCE, malignant cerebral edema; TOAST, Trial of Org 10172 in Acute Stroke Treatment; LAA, large-artery atherosclerosis; CE, cardio-embolism; SBP, systolic blood pressure; DBP, diastolic blood pressure; NIHSS, National Institutes of Health Stroke Scale; ASPECT, Alberta Stroke Program Early CT; OTP, symptoms onset to groin puncture time; OTR, time from stroke onset to recanalization; ICA, internal carotid artery; MCA, middle cerebral artery; FBG, fast blood glucose; LDL, low density lipoprotein; BUN, blood urea nitrogen; Cr, creatinine; DHC, decompressive hemicraniectomy; mTICI, modified Thrombolysis in Cerebral Infarction; mRS, modified Rankin Scale
